# Supplementary material
Source: PubMed Central journal article supplement (PMC3323901)
Supplement: neo1403_0238SD1.pdf [file neo1403_0238SD1.pdf]

**Table W1.** Primer Sequences.

| Cloning                          |                                                    |                                           |
|----------------------------------|----------------------------------------------------|-------------------------------------------|
| Target                           | Forward                                            | Reverse                                   |
| YFP                              | 5'-gtgtgtaagcttaccatgggtgagcaaggccgaggagc          | 5'-acacacggatccgagctctgtacagctcgtccatgc   |
| Drosha ΔE31                      | 5'-ccttggcggaccttttggatgagttcattttgaaatcag         | 5'-ctgattcaaaatgaactcattccaaaaggccgccaagg |
| Drosha ΔE31-32                   | 5'-ccttggcggaccttttggatgactctgcagacagtg            | 5'-cactgtctgcagagtcattccaaaaggccgccaagg   |
| Drosha ΔE30-32                   | 5'-catgaaggacacttaactgactctgcagacagtg              | 5'-cactgtctgcagagtcattccaaaaggccgccaagg   |
| Flag deletion to obtain HA-DGCR8 | 5'-ctgatcgccgccatgacaccttatgacgtgc                 | 5'-gcagctcataagggtacatggcggcgatcag        |
| Drosha E1045Q                    | 5'-ggccaattgtrttcaagcgrtaatagg                     | 5'-cctattaacgcttgaacaattggcc              |
| Drosha E1222Q                    | 5'-ggcggacctttgcaatcattttgacg                      | 5'-cgctgcaataatgattgcaaaaggccg            |
| Specific RT for Mature miRNAs    |                                                    |                                           |
| Target                           | Stem-loop Primer                                   |                                           |
| miR-17                           | 5'-gtcgatccagtcagggtccgaggtattcgactggatacagctacct  |                                           |
| miR-25                           | 5'-gtcgatccagtcagggtccgaggtattcgactggatacagctcagac |                                           |
| PCR                              |                                                    |                                           |
| Target                           | Forward                                            | Reverse                                   |
| Drosha E29-35                    | 5'-ccacaatcagagaatggaattcc                         | 5'-gacaacagtcacagtactgagc                 |
| Quantitative PCR                 |                                                    |                                           |
| Target                           | Forward                                            | Reverse                                   |
| WT Drosha                        | 5'-gcttcttccacgattgaaagag                          | 5'-cattgtctgctcccatttcc                   |
| Drosha ΔE31                      | 5'-ggcggaccttttggatgag                             | 5'-cattgtctgctcccatttcc                   |
| Drosha ΔE31-32                   | 5'-gcccaccttttggatgactc                            | 5'-cattgtctgctcccatttcc                   |
| Drosha ΔE30-32                   | 5'-atcatgaaggacacttaactgac                         | 5'-cattgtctgctcccatttcc                   |
| Endogenous Drosha                | 5'-gtgacatccagcgggaac                              | 5'-gaagcagcctcagattttgg                   |
| Endogenous DGCR8 (5'UTR)         | 5'-actcgcttagtcgccagtc                             | 5'-ggccacattgctcttttccat                  |
| pri-let-7a-3                     | 5'-accaagaccgactgcccttt                            | 5'-ctctgtccaccgagatatt                    |
| pri-miR-17                       | 5'-acatcaccttgtaaaactgaagattg                      | 5'-aaaagcactcaacatcagcag                  |
| pri-miR-25                       | 5'-ggtcgctactcacaacacag                            | 5'-ctcaggacagctgaactcc                    |
| pri-miR-16-2                     | 5'-tgttttcatcatcagatgttctg                         | 5'-agttgtgtatccctgtcacac                  |
| miR-17                           | 5'-gtcgatccagtcagggtccgaggtattcgactggatacagctacct  | 5'-gtcagggtccgaggt                        |
| miR-25                           | 5'-gtcgatccagtcagggtccgaggtattcgactggatacagctcagac | 5'-gtcagggtccgaggt                        |
| Cyclophilin A                    | 5'-gtcaacccaccggtttctt                             | 5'-ctgctgtctttggacctgt                    |
| RPLP0                            | 5'-ggcgacctggaagtrccaact                           | 5'-ccatcagcaccacagccttc                   |
| Pre-45S rRNA                     | 5'-cggctcgtgtgggtgact                              | 5'-ctccttctccaggcaga                      |
| tRNA <sup>Lys</sup>              | 5'-cccgaacaggacttgaaac                             | 5'-gcccggatagctcagtcg                     |
| Primary MiRNA Processing         |                                                    |                                           |
| Target                           | r7_Forward                                         | Reverse                                   |
| pri-miR-15b~16-2                 | 5'-taatcagctcactataggctaggttgatgaaatccta           | 5'-aatacaacaattgataaaatag                 |

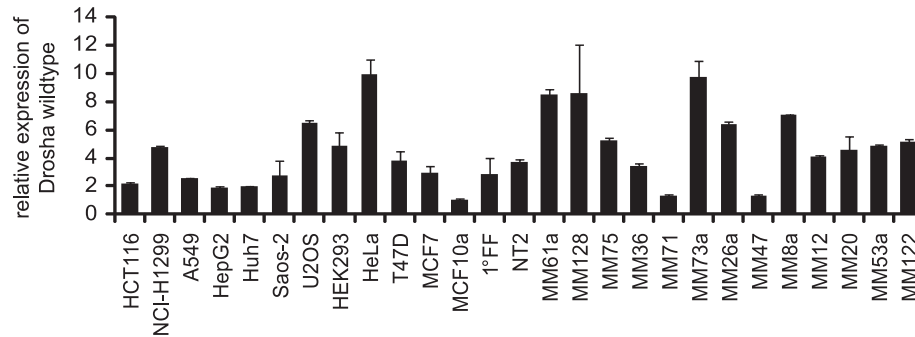

**Figure W1.** Drosha wild-type expression in different cell lines. Relative expression levels of wild-type Drosha mRNA were quantified by quantitative PCR using primers specific for the wild-type sequence. Values are normalized to RPLP0 levels. One representative data set is shown; error bars, SEM.

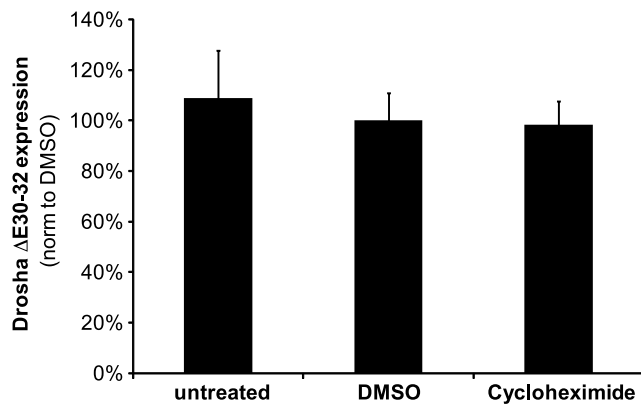

**Figure W2.** Drosha  $\Delta$ E30-32 splice variant is not subject to NMD. Ma-Mel-71 melanoma cells were treated with cycloheximide to block the initial round of translation required for NMD. The expression of the Drosha  $\Delta$ E30-32 splice variant as quantified by quantitative RT-PCR in comparison to wild-type Drosha remained unchanged when NMD was blocked, indicating that it is not subject to NMD. Depicted is the average of three experiments, with error bars representing SEM.

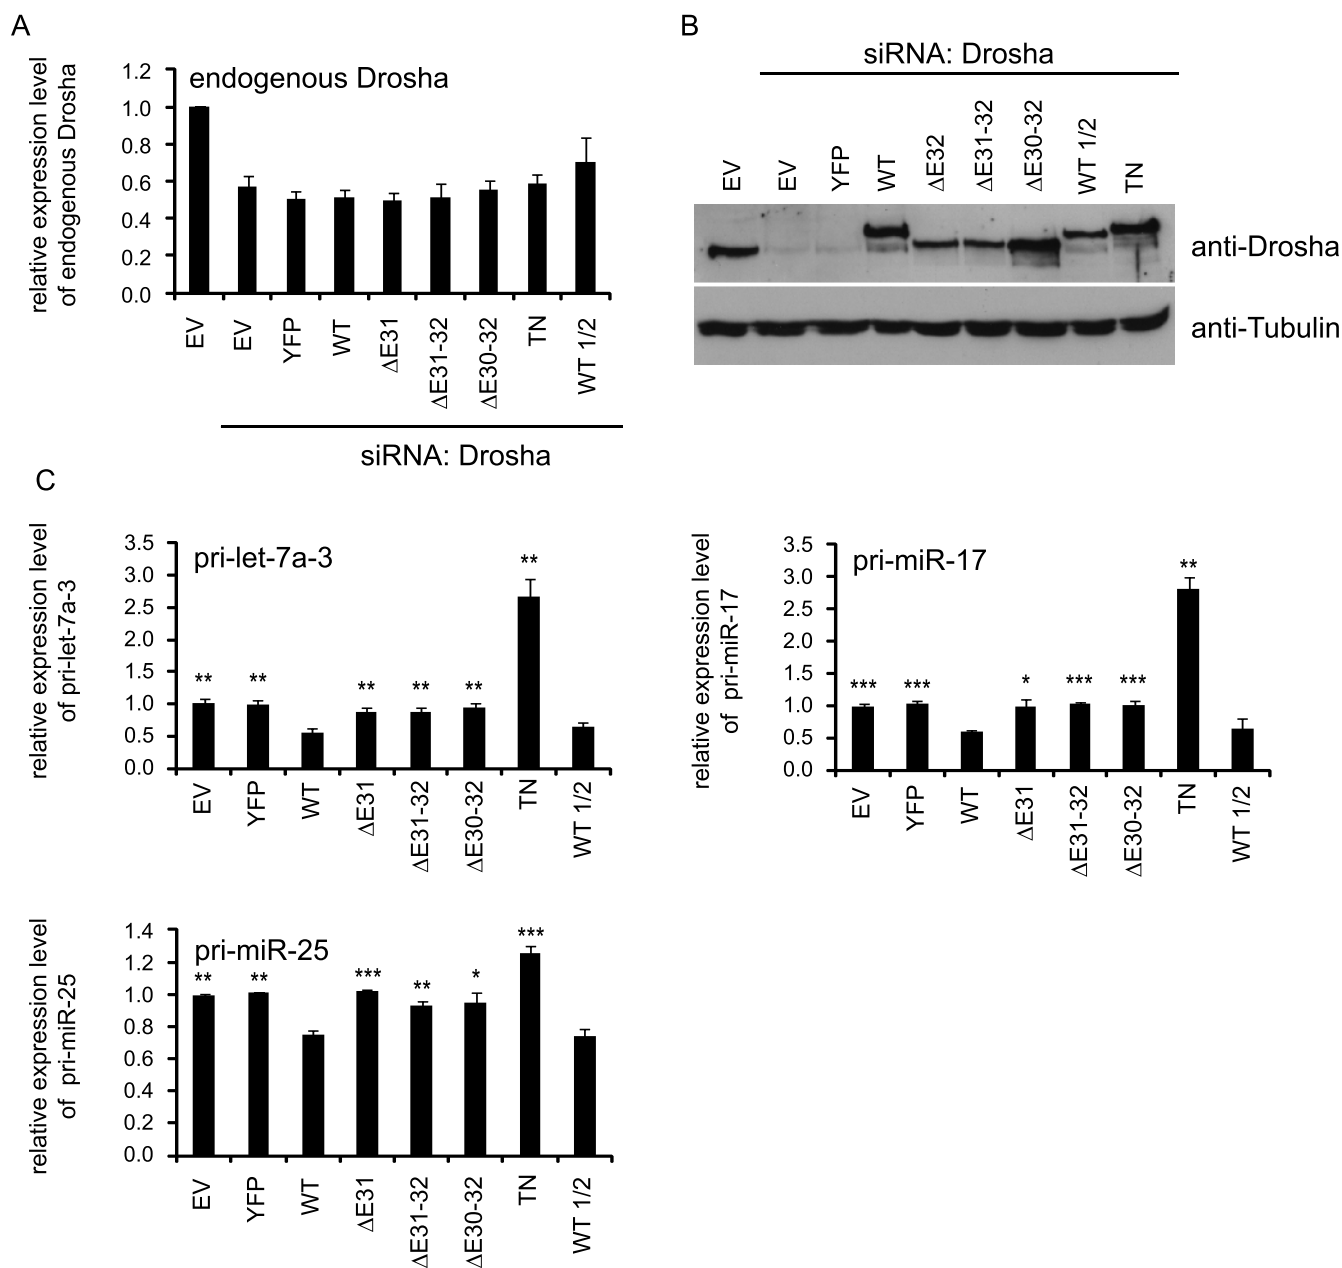

**Figure W3.** Drosha splice variants exhibit no pri-miRNA processing activity. HEK293 cells depleted of endogenous Drosha using a siRNA against the 3'UTR of Drosha were transfected with HA-DGCR8 and siRNA-resistant Drosha constructs as indicated. WT 1/2 indicates that half the amount of Drosha WT plasmid was used for transfection. EV indicates empty vector; WT, wild-type. (A) Endogenous Drosha levels were determined by quantitative RT-PCR to verify knockdown efficiency. (B) Protein expression levels of endogenous and ectopic Drosha were analyzed by Western blot. (C) Quantification of pri-miRNA levels by quantitative RT-PCR normalized to cyclophilin mRNA levels.  $n = 3$ . Error bars, SEM. Asterisks denote statistically significant differences: \* $P < .05$ , \*\* $P < .01$ , \*\*\* $P < .001$  (unpaired  $t$  test).
